# Supplementary material
Source: MDPI journal article supplement (https://www.mdpi.com/2071-1050/15/3/2408)
Supplement: s1 [file s1]

Supplementary material Figure S1- The 115 DSW were located in 25 communities at Brazilian state of Goiás, where data were collected with the aim to predict a contamination model due *Escherichia coli*

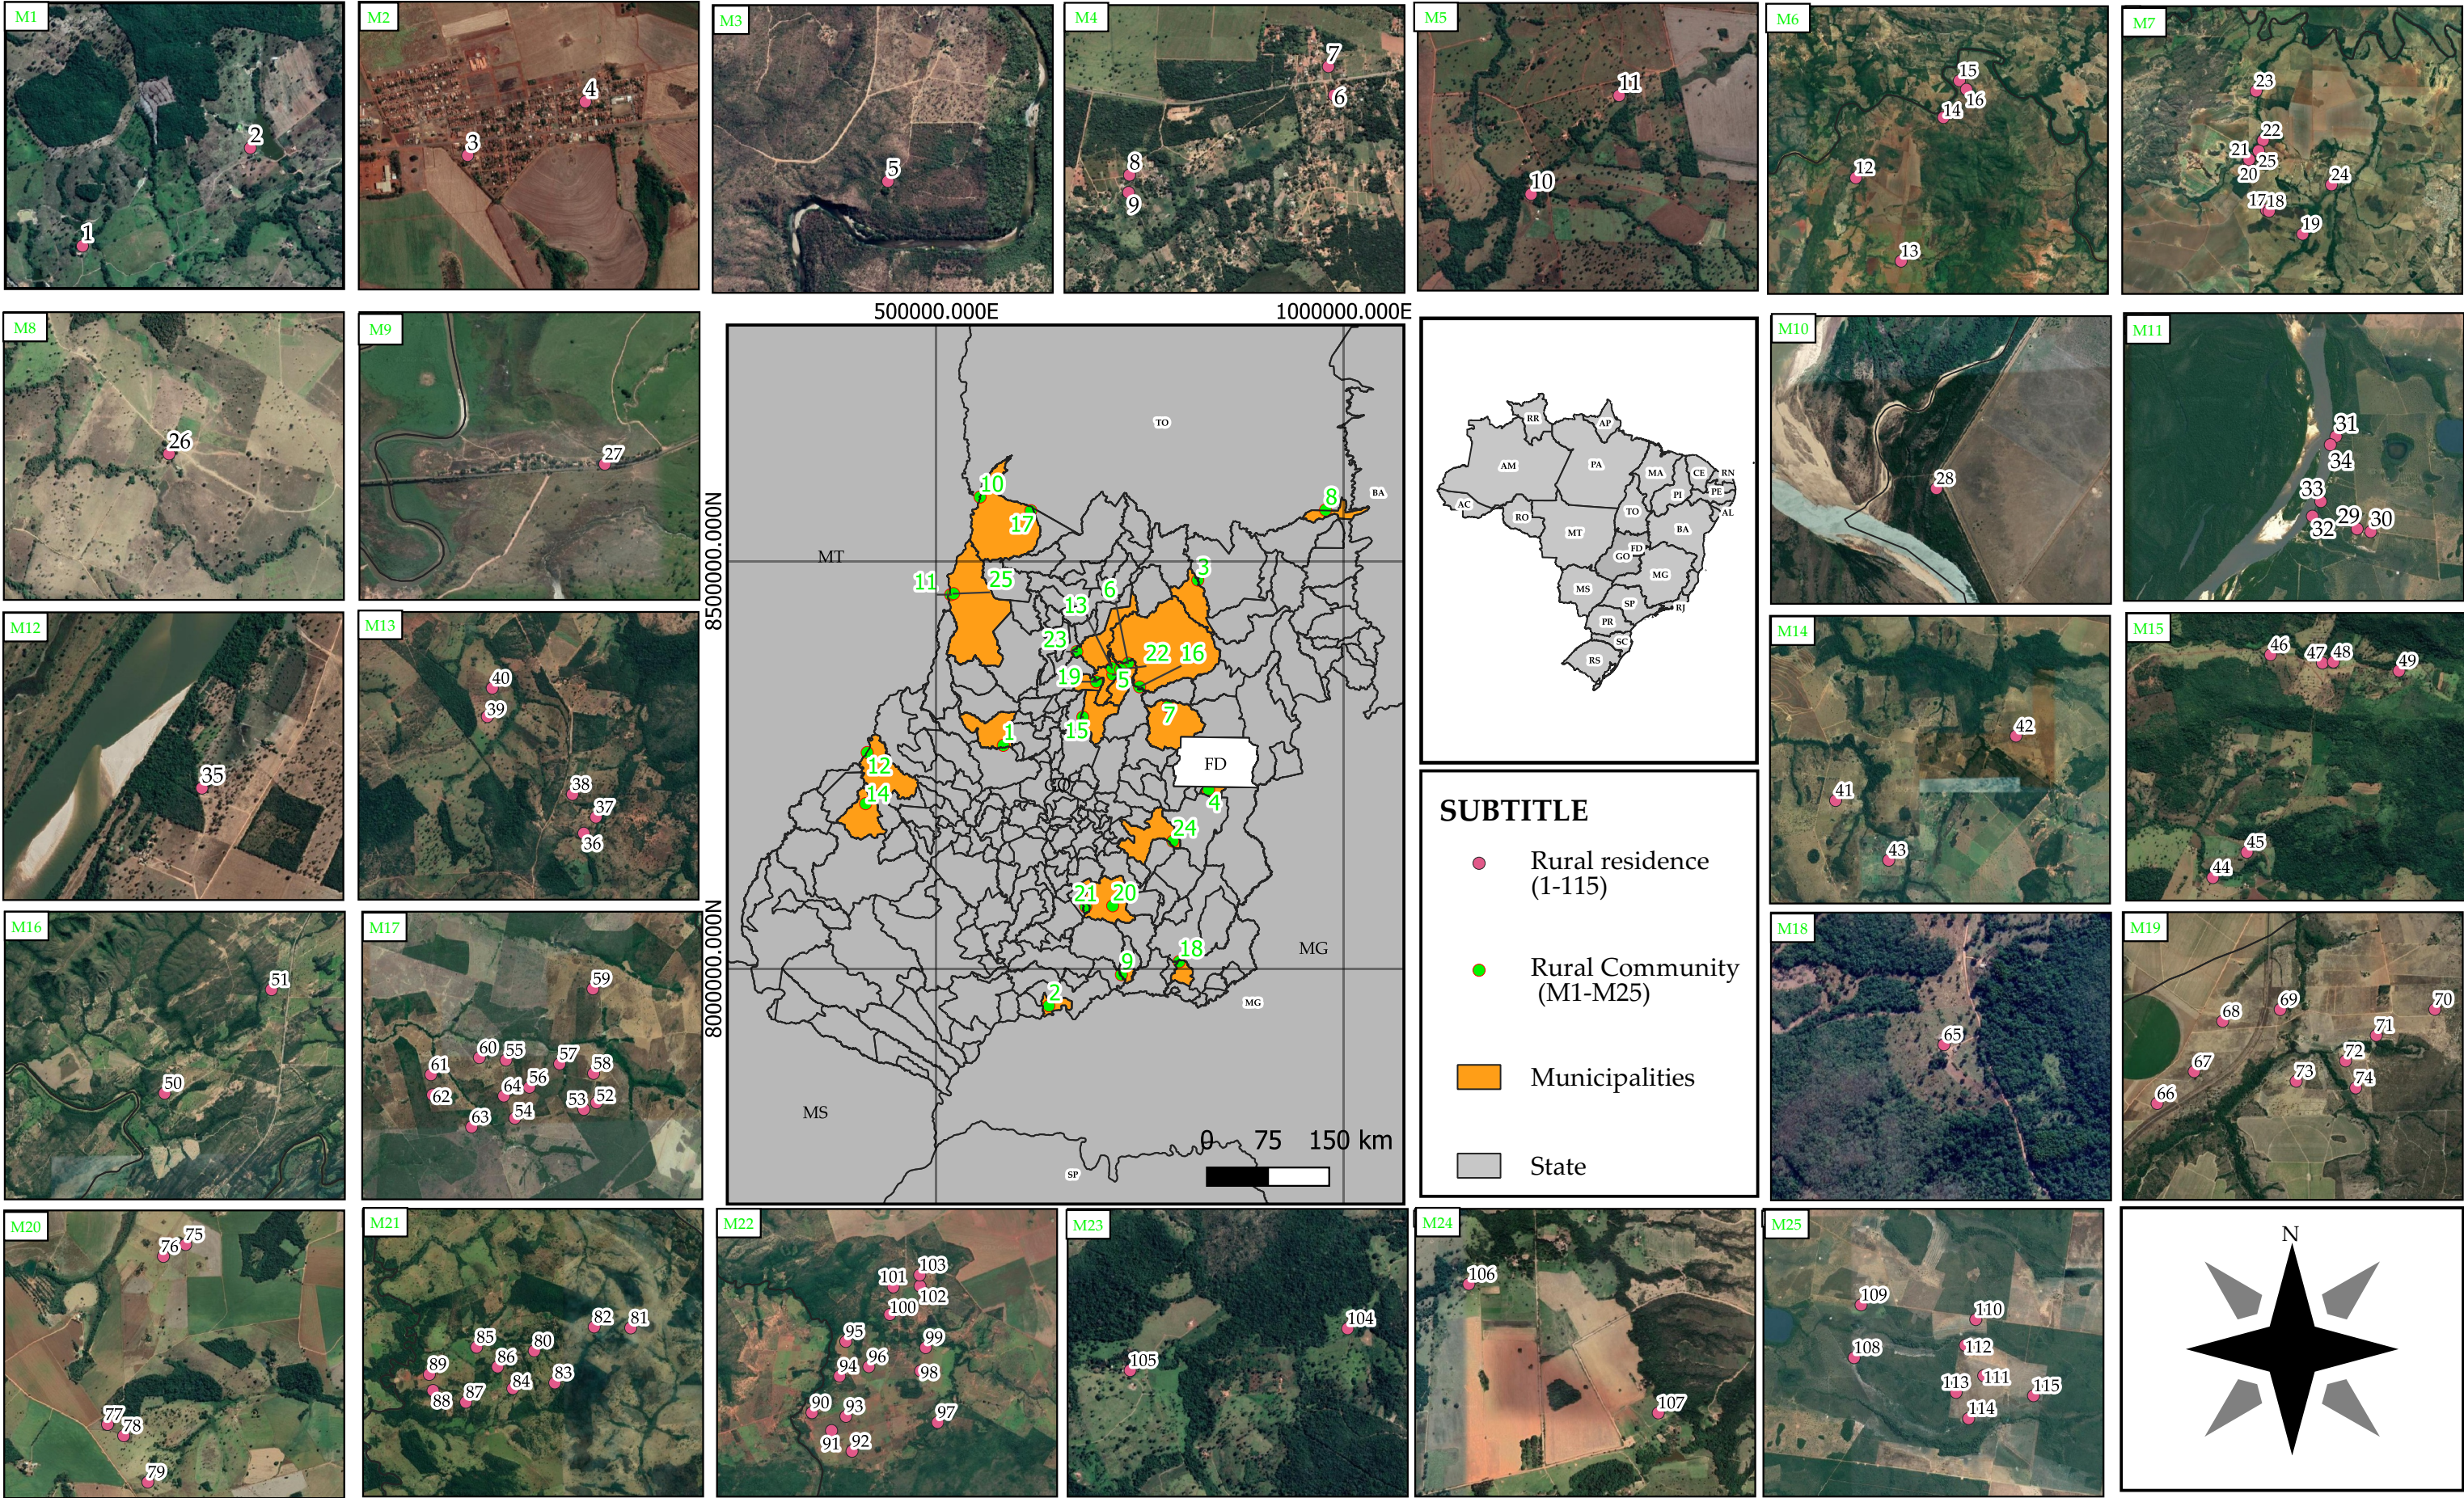

Rural Community: Água Limpa community = (M1); Córrego do Inhambú community = (M2), José de Coletto community = (M3), Mesquita community = (M4), Pombal community = (M5), Fazenda Santo Antônio da Laguna community = (M6), Sumidouro community = (M7), Taquarussu community = (M8), Arraial da Ponte = (M9), Fio Velasco = (M10), Landi = (M11), Registro do Araguaia = (M12), Engenho da Pontinha = (M13), Fortaleza = (M14), Itajá II = (M15), Julião Ribeiro = (M16), Lageado = (M17), Madre Cristina = (M18), Monte Moriá = (M19), Piracanjuba = (M20), Rochedo = (M21), Santa Fé da Laguna = (M22), São Lourenço = (M23), São Sebastião = (M24), Tarumã = (M25).



Supplementary material Table S1 - Response and predictor variables values, continuous and qualitative categorical.

| Community                    |    | Response variable       | Continuous predictor variables |       |     |                 |           |              |                |                        |                          |                           |                                | Categorical predictor variables |                  |                       |                   |                  |                  |                 |                   |                        |           |                  |
|------------------------------|----|-------------------------|--------------------------------|-------|-----|-----------------|-----------|--------------|----------------|------------------------|--------------------------|---------------------------|--------------------------------|---------------------------------|------------------|-----------------------|-------------------|------------------|------------------|-----------------|-------------------|------------------------|-----------|------------------|
| Name                         | Nº | <i>Escherichia coli</i> | Ap. color                      | Turb. | pH  | Total coliforms | DSW depth | DSW diameter | Sidewalk width | Protection wall height | Dist. from pigsty to DSW | Dist. from hennery to DSW | Dist. from permeable SS to DSW | DSW coverage                    | Fence around DSW | Use of exclusive pump | Property flooding | Corral existence | Pigsty existence | Poultry farming | Hennery existence | Permeable SS existence | Soil type | Groundwater type |
|                              |    | (NMP/100mL)             | (uC)                           | (NTU) |     | (NMP/100mL)     | (m)       | (m)          | (m)            | (m)                    | (m)                      | (m)                       | (m)                            |                                 |                  |                       |                   |                  |                  |                 |                   |                        |           |                  |
| Água Limpa (M1)              | 1  | 517.20                  | 9.2                            | 2.76  | 5.9 | 10482           | 7.0       | 2.0          | 0              | 0.25                   | 39                       | DH                        | 49                             | Yes                             | Yes              | Yes                   | No                | Yes              | Yes              | Yes             | Yes               | Yes                    | PV        | fr5              |
|                              | 2  | 1299.70                 | 0.2                            | 0.38  | 5.8 | 2909            | 15.0      | 2.0          | 1.50           | 0.00                   | 90                       | 110                       | 70                             | Yes                             | No               | Yes                   | No                | Yes              | Yes              | Yes             | Yes               | Yes                    | PV        | fr5              |
| Córrego do Inhambú (M2)      | 3  | 0.00                    | 10.9                           | 0.58  | 5.4 | 18.5            | 18.0      | 2.0          | 1.00           | 0.40                   | DH                       | 85                        | 5                              | Yes                             | No               | Yes                   | No                | No               | No               | Yes             | Yes               | Yes                    | L         | fr4              |
|                              | 4  | 0.00                    | 11                             | 0.17  | 6.1 | 8.6             | 24.0      | 2.0          | 1.00           | 0.80                   | DH                       | DH                        | DH                             | Yes                             | No               | Yes                   | No                | No               | No               | No              | DH                | No                     | L         | fr4              |
| José de Coletto (M3)         | 5  | 7.30                    | 6.6                            | 22.8  | 6.3 | 1011.2          | 10.0      | 2.0          | 0              | 0.20                   | DH                       | DH                        | DH                             | Yes                             | No               | Yes                   | No                | No               | No               | No              | DH                | No                     | C         | fr5              |
| Mesquita (M4)                | 6  | 290.90                  | 4.1                            | 2.15  | 4.8 | 3448            | 18.0      | 1.2          | 0              | 0.28                   | DH                       | 35                        | 38                             | Yes                             | No               | Yes                   | No                | No               | No               | Yes             | Yes               | Yes                    | C         | fr4              |
|                              | 7  | 20.30                   | 94.7                           | 9.8   | 4.7 | 76.7            | 25.0      | 1.2          | 0              | 0.30                   | 32                       | 40                        | 32                             | Yes                             | Yes              | Yes                   | Yes               | No               | Yes              | Yes             | Yes               | Yes                    | L         | fr4              |
|                              | 8  | 0.00                    | 8                              | 4.77  | 4.9 | 686.7           | 12.0      | 1.0          | 0.25           | 0.60                   | DH                       | DH                        | DH                             | Yes                             | No               | Yes                   | No                | No               | No               | No              | DH                | No                     | L         | fr4              |
|                              | 9  | 103.90                  | 4                              | 11    | 5.7 | 993             | 9.0       | 1.0          | 0              | 0.20                   | DH                       | 30                        | 20                             | Yes                             | No               | Yes                   | No                | No               | No               | Yes             | Yes               | Yes                    | C         | fr4              |
| Pombal (M5)                  | 10 | 0.00                    | 9.4                            | 0.72  | 6.4 | 410.6           | 6.0       | 0.6          | 3.00           | 0.00                   | 59                       | DH                        | 24                             | Yes                             | No               | Yes                   | Yes               | Yes              | Yes              | No              | DH                | Yes                    | L         | fr5              |
|                              | 11 | 4.10                    | 10.3                           | 0.43  | 5.7 | 579.4           | 9.0       | 1.2          | 0              | 0.50                   | 36                       | 30                        | 26                             | Yes                             | No               | Yes                   | No                | Yes              | Yes              | Yes             | Yes               | Yes                    | L         | fr5              |
| Santo Antônio da Laguna (M6) | 12 | 0.00                    | 17.6                           | 13.9  | 6.5 | 307.6           | 7.0       | 1.2          | 0.84           | 0.26                   | DH                       | DH                        | 20                             | Yes                             | No               | Yes                   | No                | No               | No               | No              | DH                | Yes                    | C         | fr5              |
|                              | 13 | 4.10                    | 0.4                            | 0.54  | 6.5 | 2613            | 3.0       | 1.2          | 0              | 0.26                   | 88                       | 12                        | 27                             | IM                              | No               | Yes                   | No                | No               | Yes              | Yes             | Yes               | Yes                    | C         | fr5              |
|                              | 14 | 3076.00                 | 8.8                            | 3.91  | 6.6 | 8701            | 12.0      | 1.3          | 0.20           | 0.35                   | 24                       | 15                        | 21                             | Yes                             | No               | Yes                   | No                | No               | Yes              | Yes             | Yes               | Yes                    | C         | fr5              |
|                              | 15 | 116.90                  | 4.7                            | 3.18  | 6.7 | 980.4           | 14.0      | 1.2          | 0.30           | 0.60                   | 15                       | 44                        | 10                             | Yes                             | 1                | Yes                   | No                | Yes              | Yes              | Yes             | Yes               | Yes                    | C         | fr5              |
|                              | 16 | 0.00                    | 1.2                            | 0.85  | 6.6 | 24196           | 5.3       | 1.1          | 0              | 0.42                   | 110                      | 125                       | 98                             | Yes                             | 1                | Yes                   | Yes               | Yes              | Yes              | Yes             | Yes               | Yes                    | C         | fr5              |
| Sumidouro (M7)               | 17 | 129.10                  | 27                             | 6.6   | 8.0 | 2046            | 3.0       | 4.0          | 0              | 0.00                   | 52                       | 56                        | 34                             | No                              | No               | Yes                   | No                | No               | Yes              | Yes             | Yes               | Yes                    | L         | k4               |
|                              | 18 | 0.00                    | 2.2                            | 1.02  | 7.2 | 613.1           | 7.0       | 1.2          | 0              | 0.07                   | DH                       | DH                        | 134                            | IM                              | No               | Yes                   | No                | No               | No               | No              | DH                | Yes                    | L         | k4               |
|                              | 19 | 2.00                    | 113                            | 36.1  | 7.2 | 866.4           | 5.0       | 1.0          | 0.50           | 0.50                   | 43                       | 73                        | 52                             | Yes                             | No               | Yes                   | No                | No               | Yes              | Yes             | Yes               | Yes                    | L         | k4               |
|                              | 20 | 547.50                  | 19.7                           | 12.4  | 7.2 | 24196           | 9.0       | 1.5          | 0              | 0.70                   | 36                       | DH                        | 24                             | Yes                             | No               | Yes                   | No                | No               | Yes              | Yes             | No                | Yes                    | L         | fr4              |
|                              | 21 | 2909.00                 | 10.2                           | 4.99  | 7.3 | 17329           | 11.0      | 1.5          | 0              | 0.50                   | 22                       | DH                        | 33                             | Yes                             | No               | Yes                   | No                | No               | Yes              | Yes             | No                | Yes                    | L         | fr4              |
|                              | 22 | 59.00                   | 11.1                           | 9.14  | 7.0 | 24196           | 10.0      | 1.2          | 0              | 0.50                   | 85                       | 50                        | 60                             | Yes                             | No               | Yes                   | No                | No               | Yes              | Yes             | Yes               | Yes                    | L         | fr4              |
|                              | 23 | 111.20                  | 57.5                           | 75.5  | 7.2 | 906             | 4.5       | 1.0          | 0              | 0.32                   | 91                       | DH                        | 129                            | Yes                             | No               | Yes                   | Yes               | No               | Yes              | Yes             | No                | Yes                    | L         | fr4              |
|                              | 24 | 13.10                   | 5.9                            | 3.12  | 7.0 | 7701            | 4.0       | 1.2          | 0              | 0.00                   | 170                      | 80                        | 93                             | Yes                             | No               | Yes                   | No                | Yes              | Yes              | Yes             | Yes               | Yes                    | L         | fr4              |
|                              | 25 | 157.80                  | 0.6                            | 0.3   | 8.0 | 9208            | 10.0      | 1.4          | 0              | 0.30                   | DH                       | 86                        | 100                            | IM                              | No               | Yes                   | No                | Yes              | No               | Yes             | Yes               | Yes                    | L         | fr4              |
| Taquarussu (M8)              | 26 | 98.60                   | 6                              | 0.5   | 6.6 | 4106            | 3.0       | 1.8          | 0              | 0.52                   | 162                      | DH                        | 180                            | No                              | No               | Yes                   | No                | Yes              | Yes              | Yes             | No                | Yes                    | C         | fr4              |
| Arraial da Ponte (M9)        | 27 | 8.50                    | 5.9                            | 1.57  | 6.1 | 24196           | 30.0      | 1.5          | 0.30           | 0.50                   | DH                       | DH                        | 32                             | Yes                             | No               | Yes                   | No                | No               | No               | Yes             | No                | Yes                    | PV        | fr5              |
| Fio Velasco (M10)            | 28 | 1.00                    | 129                            | 37.1  | 5.5 | 178.5           | 8.0       | 1.5          | 0              | 0.50                   | DH                       | 113                       | 97                             | Yes                             | No               | Yes                   | Yes               | No               | No               | Yes             | Yes               | Yes                    | F         | gr4              |
| Landi (M11)                  | 29 | 0.00                    | 2.9                            | 0.91  | 6.2 | 24196           | 12.0      | 1.4          | 2.00           | 0.28                   | DH                       | DH                        | 10                             | IM                              | No               | Yes                   | No                | No               | No               | No              | DH                | Yes                    | F         | gr5              |
|                              | 30 | 24.30                   | 1.6                            | 0.83  | 4.6 | 193.5           | 9.0       | 1.2          | 0              | 0.40                   | DH                       | 42                        | 23                             | IM                              | No               | Yes                   | No                | No               | No               | Yes             | Yes               | Yes                    | F         | gr5              |
|                              | 31 | 0.00                    | 4.4                            | 1.27  | 4.9 | 1986.3          | 6.0       | 1.3          | 0              | 0.60                   | DH                       | 106                       | 93                             | Yes                             | 1                | Yes                   | No                | No               | No               | Yes             | Yes               | Yes                    | F         | gr4              |
|                              | 32 | 0.00                    | 9.4                            | 3.74  | 5.8 | 166.4           | 10.0      | 1.1          | 0              | 0.00                   | DH                       | DH                        | 90                             | Yes                             | No               | Yes                   | No                | No               | No               | No              | DH                | Yes                    | G         | gr4              |
|                              | 33 | 0.00                    | 14.7                           | 5.48  | 5.7 | 151.5           | 18.0      | 1.2          | 2.00           | 0.60                   | 9                        | 6                         | 38                             | IM                              | No               | Yes                   | No                | Yes              | Yes              | Yes             | Yes               | Yes                    | G         | gr4              |
|                              | 34 | 6.30                    | 6                              | 1.67  | 4.9 | 325.5           | 8.0       | 1.4          | 0              | 0.70                   | DH                       | 55                        | 39                             | Yes                             | No               | Yes                   | No                | No               | No               | Yes             | Yes               | Yes                    | F         | gr4              |

**Supplementary material Table S1 (Cont.)- Response and predictor variables values, continuous and qualitative categorical.**

| Community                  |    | Response variable       | Continuous predictor variables |       |     |                 |           |              |                |                        |                          |                            |                                | Categorical predictor variables |                  |                       |                   |                  |                  |                 |                   |                        |           |                  |
|----------------------------|----|-------------------------|--------------------------------|-------|-----|-----------------|-----------|--------------|----------------|------------------------|--------------------------|----------------------------|--------------------------------|---------------------------------|------------------|-----------------------|-------------------|------------------|------------------|-----------------|-------------------|------------------------|-----------|------------------|
| Name                       | Nº | <i>Escherichia coli</i> | Ap. color                      | Turb. | pH  | Total coliforms | DSW depth | DSW diameter | Sidewalk width | Protection wall height | Dist. from pigsty to DSW | Dist. from hennerly to DSW | Dist. from permeable SS to DSW | DSW coverage                    | Fence around DSW | Use of exclusive pump | Property flooding | Corral existence | Pigsty existence | Poultry farming | Hennery existence | Permeable SS existence | Soil type | Groundwater type |
|                            |    | (NMP/100mL)             | (uC)                           | (NTU) |     | (NMP/100mL)     | (m)       | (m)          | (m)            | (m)                    | (m)                      | (m)                        | (m)                            |                                 |                  |                       |                   |                  |                  |                 |                   |                        |           |                  |
| Registro do Araguaia (M12) | 35 | 1.00                    | 76.7                           | 24.4  | 5.1 | 2282            | 6.0       | 1.0          | 0              | 0.60                   | 41                       | 33                         | 60                             | IM                              | 1                | Yes                   | No                | Yes              | Yes              | Yes             | Yes               | Yes                    | F         | gr4              |
| Engenho da Pontinha (M13)  | 36 | 67.70                   | 11.9                           | 4.16  | 6.1 | 2419            | 15.5      | 1.2          | 0              | 0.30                   | 40                       | 14                         | 16                             | IM                              | No               | Yes                   | No                | Yes              | Yes              | Yes             | Yes               | Yes                    | C         | fr5              |
|                            | 37 | 6.30                    | 8.6                            | 2.6   | 6.8 | 2419            | 5.0       | 1.2          | 0              | 1.00                   | 38                       | DH                         | 72                             | No                              | No               | Yes                   | No                | Yes              | Yes              | Yes             | No                | Yes                    | C         | fr5              |
|                            | 38 | 4.10                    | 55.6                           | 13.1  | 6.8 | 2419            | 3.0       | 1.2          | 0              | 0.00                   | 345                      | DH                         | 359                            | IM                              | 1                | Yes                   | No                | Yes              | Yes              | Yes             | No                | Yes                    | C         | fr5              |
|                            | 39 | 4.10                    | 2.9                            | 0.89  | 6.5 | 2419            | 6.5       | 1.2          | 0              | 0.40                   | 38                       | DH                         | 16                             | Yes                             | No               | Yes                   | No                | Yes              | Yes              | Yes             | No                | Yes                    | C         | fr5              |
|                            | 40 | 60.90                   | 15.4                           | 5.3   | 6.7 | 2419            | 4.0       | 2.0          | 0              | 0.80                   | 192                      | 202                        | 173                            | IM                              | 1                | Yes                   | No                | Yes              | Yes              | Yes             | Yes               | Yes                    | C         | fr5              |
| Fortaleza (M14)            | 41 | 2419                    | 9                              | 1.49  | 5.9 | 1011.2          | 23.0      | 2.0          | 0              | 0.70                   | 38                       | 14                         | 27                             | IM                              | No               | Yes                   | No                | Yes              | Yes              | Yes             | Yes               | Yes                    | L         | fr5              |
|                            | 42 | 129.60                  | 1.6                            | 1.14  | 5.4 | 1413.6          | 20.0      | 1.8          | 0              | 0.80                   | 46                       | DH                         | 22                             | Yes                             | No               | Yes                   | No                | No               | Yes              | Yes             | No                | Yes                    | L         | fr5              |
|                            | 43 | 0.00                    | 1.2                            | 0.58  | 5.5 | 410.6           | 2.0       | 1.2          | 0              | 0.00                   | 1300                     | 1300                       | 1300                           | IM                              | 1                | Yes                   | No                | Yes              | Yes              | Yes             | Yes               | Yes                    | L         | fr5              |
| Itajá II (M15)             | 44 | 1.00                    | 2.6                            | 2.26  | 6.1 | 2419            | 3.0       | 1.0          | 0              | 0.00                   | 240                      | DH                         | 232                            | IM                              | 1                | Yes                   | Yes               | Yes              | Yes              | No              | DH                | Yes                    | N         | fr5              |
|                            | 45 | 259.50                  | 2.4                            | 1.38  | 6.9 | 2419            | 6.0       | 1.4          | 0              | 0.50                   | 16                       | 16                         | 20                             | Yes                             | No               | Yes                   | Yes               | Yes              | Yes              | Yes             | Yes               | Yes                    | N         | fr5              |
|                            | 46 | 0.00                    | 2.7                            | 1.56  | 6.0 | 613.1           | 10.0      | 1.0          | 0.55           | 0.55                   | 74                       | 72                         | 52                             | Yes                             | No               | Yes                   | No                | Yes              | Yes              | Yes             | Yes               | Yes                    | N         | fr5              |
|                            | 47 | 344.80                  | 1.2                            | 0.35  | 7.0 | 2419            | 7.0       | 1.0          | 0              | 1.00                   | 28                       | DH                         | 20                             | Yes                             | No               | Yes                   | No                | Yes              | Yes              | Yes             | No                | Yes                    | N         | fr5              |
|                            | 48 | 0.00                    | 0.8                            | 0.55  | 7.0 | 2419            | 5.5       | 1.6          | 0              | 0.40                   | 36                       | DH                         | DH                             | IM                              | No               | Yes                   | No                | Yes              | Yes              | Yes             | No                | No                     | N         | fr5              |
|                            | 49 | 3.10                    | 1.9                            | 0.55  | 7.8 | 488.4           | 6.5       | 1.2          | 0              | 0.50                   | 125                      | DH                         | 89                             | Yes                             | 1                | Yes                   | No                | Yes              | Yes              | Yes             | No                | Yes                    | N         | fr5              |
| Julião Ribeiro (M16)       | 50 | 5.20                    | 3.4                            | 1.5   | 7.5 | 3873            | 5.0       | 1.8          | 0              | 0.15                   | 263                      | 263                        | DH                             | Yes                             | 1                | Yes                   | No                | Yes              | Yes              | Yes             | Yes               | No                     | L         | fr4              |
|                            | 51 | 8.50                    | 20.1                           | 2.56  | 7.9 | 980.4           | 25.0      | 1.5          | 0              | 0.25                   | 77                       | DH                         | 97                             | Yes                             | 1                | Yes                   | Yes               | Yes              | Yes              | Yes             | No                | Yes                    | L         | fr4              |
| Lageado (M17)              | 52 | 42.00                   | 11.3                           | 10.75 | 4.8 | 2613            | 10.0      | 2.0          | 0              | 0.30                   | 47                       | 54                         | 55                             | IM                              | 1                | No                    | Yes               | Yes              | Yes              | Yes             | Yes               | Yes                    | L         | fr5              |
|                            | 53 | 19.70                   | 7.4                            | 2.13  | 5.3 | 12997           | 8.0       | 1.4          | 0              | 0.50                   | 24                       | 25                         | 10                             | Yes                             | No               | Yes                   | No                | Yes              | Yes              | Yes             | Yes               | Yes                    | L         | fr5              |
|                            | 54 | 10.90                   | 2.3                            | 0.89  | 6.1 | 1203.3          | 8.0       | 1.4          | 0.30           | 0.60                   | 52                       | 40                         | 31                             | IM                              | No               | Yes                   | Yes               | Yes              | Yes              | Yes             | Yes               | Yes                    | L         | fr5              |
|                            | 55 | 7.40                    | 2.5                            | 0.82  | 5.5 | 3448            | 15.0      | 1.2          | 0.70           | 0.70                   | 28                       | 8                          | 18                             | Yes                             | No               | Yes                   | No                | Yes              | Yes              | Yes             | Yes               | Yes                    | L         | fr5              |
|                            | 56 | 146.70                  | 2.5                            | 0.96  | 6.5 | 4352            | 8.0       | 1.6          | 0              | 0.50                   | DH                       | DH                         | 16                             | Yes                             | No               | Yes                   | No                | Yes              | No               | Yes             | No                | Yes                    | L         | fr5              |
|                            | 57 | 0.00                    | 0.4                            | 0.55  | 5.5 | 461.1           | 13.0      | 1.4          | 0              | 0.60                   | 51                       | 56                         | 18                             | Yes                             | No               | Yes                   | No                | Yes              | Yes              | Yes             | Yes               | Yes                    | L         | fr5              |
|                            | 58 | 238.20                  | 0.9                            | 0.94  | 6.5 | 3873            | 9.0       | 1.2          | 0              | 1.20                   | 52                       | 28                         | 40                             | Yes                             | 1                | Yes                   | Yes               | Yes              | Yes              | Yes             | Yes               | Yes                    | L         | fr5              |
|                            | 59 | 178.50                  | 3.8                            | 1.98  | 5.1 | 5172            | 9.0       | 1.2          | 0              | 0.32                   | DH                       | 6                          | DH                             | IM                              | No               | Yes                   | No                | Yes              | No               | Yes             | Yes               | No                     | L         | fr5              |
|                            | 60 | 39.90                   | 0.7                            | 0.37  | 5.3 | 4884            | 10.0      | 1.0          | 0              | 0.10                   | 0                        | DH                         | 13                             | IM                              | 1                | Yes                   | No                | Yes              | Yes              | Yes             | No                | Yes                    | L         | fr5              |
|                            | 61 | 275.50                  | 3.7                            | 1.28  | 5.4 | 665.3           | 8.0       | 1.4          | 0.50           | 0.60                   | 21                       | 23                         | 12                             | Yes                             | No               | No                    | No                | Yes              | Yes              | Yes             | Yes               | Yes                    | L         | fr5              |
|                            | 62 | 85.70                   | 2.5                            | 1.49  | 5.1 | 6131            | 8.0       | 1.4          | 0              | 0.30                   | 27                       | 11                         | 3                              | IM                              | No               | Yes                   | Yes               | Yes              | Yes              | Yes             | Yes               | Yes                    | L         | fr5              |
|                            | 63 | 0.00                    | 0.9                            | 0.99  | 4.7 | 980.4           | 8.0       | 1.4          | 0              | 0.25                   | 25                       | 9                          | 28                             | IM                              | No               | Yes                   | No                | Yes              | Yes              | Yes             | Yes               | Yes                    | L         | fr5              |
|                            | 64 | 41.00                   | 3.2                            | 2.08  | 5.4 | 3654            | 7.0       | 1.2          | 0              | 0.70                   | 37                       | DH                         | 13                             | IM                              | No               | Yes                   | Yes               | Yes              | Yes              | Yes             | No                | Yes                    | L         | fr5              |
| Madre Cristina (M18)       | 65 | 1299.70                 | 6                              | 1.45  | 6.4 | 12997           | 5.0       | 1.5          | 0              | 0.00                   | 67                       | 66                         | 100                            | IM                              | No               | Yes                   | No                | Yes              | Yes              | Yes             | Yes               | Yes                    | C         | fr5              |

**Supplementary material Table S1 (Cont.)- Response and predictor variables values, continuous and qualitative categorical.**

| Community                |        | Response variable       | Continuous predictor variables |       |        |                 |           |              |                |                        |                          |                            |                                | Categorical predictor variables |                  |                       |                   |                  |                  |                 |                   |                        |           |                  |
|--------------------------|--------|-------------------------|--------------------------------|-------|--------|-----------------|-----------|--------------|----------------|------------------------|--------------------------|----------------------------|--------------------------------|---------------------------------|------------------|-----------------------|-------------------|------------------|------------------|-----------------|-------------------|------------------------|-----------|------------------|
| Name                     | Nº     | <i>Escherichia coli</i> | Ap. color                      | Turb. | pH     | Total coliforms | DSW depth | DSW diameter | Sidewalk width | Protection wall height | Dist. from pigsty to DSW | Dist. from hennerly to DSW | Dist. from permeable SS to DSW | DSW coverage                    | Fence around DSW | Use of exclusive pump | Property flooding | Corral existence | Pigsty existence | Poultry farming | Hennery existence | Permeable SS existence | Soil type | Groundwater type |
|                          |        | (NMP/100mL)             | (uC)                           | (NTU) |        | (NMP/100mL)     | (m)       | (m)          | (m)            | (m)                    | (m)                      | (m)                        | (m)                            |                                 |                  |                       |                   |                  |                  |                 |                   |                        |           |                  |
| Monte Moriá (M19)        | 66     | 0.00                    | 1                              | 0.56  | 7.3    | 235.9           | 5.0       | 1.2          | 0.50           | 0.40                   | DH                       | DH                         | DH                             | Yes                             | No               | Yes                   | No                | Yes              | No               | Yes             | No                | No                     | L         | fr5              |
|                          | 67     | 1.00                    | 24                             | 7.71  | 6.0    | 42.6            | 8.5       | 1.2          | 0              | 0.20                   | 41                       | 16                         | 40                             | IM                              | No               | Yes                   | No                | Yes              | Yes              | Yes             | Yes               | Yes                    | L         | fr5              |
|                          | 68     | 21.30                   | 1.4                            | 0.31  | 5.0    | 5172.0          | 5.0       | 1.4          | 0              | 0.20                   | DH                       | DH                         | 16                             | IM                              | No               | Yes                   | No                | No               | No               | Yes             | No                | Yes                    | L         | fr5              |
|                          | 69     | 18.70                   | 5.2                            | 1.35  | 5.8    | 4884.0          | 9.0       | 1.2          | 0              | 0.60                   | 75                       | 29                         | 29                             | Yes                             | No               | Yes                   | Yes               | Yes              | Yes              | Yes             | Yes               | Yes                    | L         | fr5              |
|                          | 70     | 2.00                    | 1.6                            | 0.59  | 5.5    | 14136.0         | 7.0       | 1.2          | 0              | 0.30                   | 22                       | DH                         | DH                             | Yes                             | No               | Yes                   | No                | No               | Yes              | No              | DH                | No                     | L         | fr5              |
|                          | 71     | 8.40                    | 24.3                           | 9.01  | 5.2    | 4106.0          | 5.5       | 1.2          | 0              | 0.15                   | DH                       | DH                         | DH                             | IM                              | No               | Yes                   | No                | No               | No               | Yes             | No                | No                     | L         | fr5              |
|                          | 72     | 0.00                    | 5.9                            | 2.09  | 5.3    | 17329.0         | 7.0       | 1.2          | 0              | 0.15                   | DH                       | DH                         | DH                             | IM                              | No               | Yes                   | No                | No               | Yes              | Yes             | No                | No                     | L         | fr5              |
|                          | 73     | 0.00                    | 0.8                            | 0.18  | 4.9    | 980.4           | 9.0       | 1.2          | 0.14           | 0.25                   | 13                       | 15                         | 20                             | IM                              | No               | Yes                   | No                | Yes              | Yes              | Yes             | Yes               | Yes                    | L         | fr5              |
|                          | 74     | 59.40                   | 3.4                            | 1.24  | 5.4    | 3076.0          | 4.0       | 1.2          | 0              | 0.20                   | 13                       | 12                         | 28                             | Yes                             | No               | Yes                   | No                | No               | Yes              | Yes             | Yes               | Yes                    | L         | fr5              |
| Piracanjuba (M20)        | 75     | 3.10                    | 5.2                            | 4.11  | 6.6    | 2419.0          | 7.5       | 1.5          | 0              | 0.20                   | 51                       | DH                         | 25                             | Yes                             | No               | Yes                   | No                | Yes              | Yes              | Yes             | Yes               | Yes                    | L         | fr5              |
|                          | 76     | 2.00                    | 7.4                            | 1.33  | 5.8    | 2419.0          | 8.0       | 1.0          | 1.50           | 0.50                   | DH                       | 21                         | 25                             | IM                              | No               | Yes                   | Yes               | Yes              | No               | Yes             | Yes               | Yes                    | L         | fr5              |
|                          | 77     | 13.20                   | 6.3                            | 3.17  | 6.2    | 2419.0          | 8.0       | 1.0          | 0              | 0.50                   | DH                       | DH                         | 19                             | Yes                             | No               | No                    | No                | No               | Yes              | Yes             | No                | Yes                    | L         | fr5              |
|                          | 78     | 129.60                  | 4.5                            | 1.99  | 6.1    | 2419.0          | 9.0       | 1.0          | 0              | 0.20                   | 24                       | 6                          | 18                             | Yes                             | No               | Yes                   | No                | Yes              | Yes              | Yes             | Yes               | Yes                    | L         | fr5              |
|                          | 79     | 16.80                   | 3                              | 1.78  | 6.3    | 2419.6          | 6.0       | 1.0          | 0              | 0.00                   | 89                       | 98                         | 83                             | IM                              | 1                | Yes                   | No                | Yes              | Yes              | Yes             | Yes               | Yes                    | L         | fr5              |
| Rochedo (M21)            | 80     | 1.00                    | 0.4                            | 0.47  | 6.4    | 770.1           | 7.0       | 1.1          | 0              | 0.50                   | 332                      | 340                        | 340                            | Yes                             | No               | Yes                   | No                | Yes              | Yes              | Yes             | Yes               | Yes                    | PV        | fr5              |
|                          | 81     | 2419                    | 11.6                           | 3.2   | 6.0    | 2419.0          | 2.0       | 1.5          | 0              | 0.00                   | 275                      | 263                        | 280                            | IM                              | 1                | Yes                   | Yes               | No               | Yes              | Yes             | Yes               | Yes                    | PV        | fr5              |
|                          | 82     | 2.00                    | 7.3                            | 2.33  | 6.0    | 1986.3          | 3.0       | 1.0          | 0              | 0.00                   | 233                      | 233                        | 233                            | Yes                             | No               | Yes                   | No                | Yes              | Yes              | Yes             | Yes               | Yes                    | PV        | fr5              |
|                          | 83     | 5.20                    | 6                              | 1.45  | 6.4    | 2419.0          | 3.0       | 1.0          | 0              | 0.60                   | 67                       | DH                         | 37                             | IM                              | No               | Yes                   | No                | Yes              | Yes              | Yes             | No                | Yes                    | PV        | fr5              |
|                          | 84     | 0.00                    | 13                             | 3.2   | 5.8    | 2419.0          | 13.0      | 1.6          | 0              | 0.60                   | 7                        | DH                         | 25                             | Yes                             | No               | Yes                   | No                | Yes              | Yes              | Yes             | No                | Yes                    | PV        | fr5              |
|                          | 85     | 0.00                    | 67.3                           | 11.5  | 7.0    | 344.8           | 2.5       | 1.0          | 0              | 0.50                   | DH                       | DH                         | 287                            | IM                              | 1                | Yes                   | No                | Yes              | No               | Yes             | No                | Yes                    | PV        | fr5              |
|                          | 86     | 95.90                   | 14.3                           | 2.41  | 6.7    | 2419.0          | 4.0       | 3.0          | 0              | 0.00                   | 286                      | DH                         | 303                            | No                              | 1                | Yes                   | No                | Yes              | Yes              | Yes             | No                | Yes                    | PV        | fr5              |
|                          | 87     | 1.00                    | 2.7                            | 0.79  | 6.7    | 2419.0          | 13.0      | 2.0          | 0              | 0.33                   | DH                       | DH                         | 69                             | IM                              | No               | Yes                   | No                | Yes              | No               | No              | DH                | Yes                    | PV        | fr5              |
|                          | 88     | 1.00                    | 6.6                            | 1.17  | 5.9    | 2419.0          | 14.0      | 1.7          | 0              | 0.57                   | 12                       | 24                         | 16                             | IM                              | No               | Yes                   | No                | Yes              | Yes              | Yes             | Yes               | Yes                    | PV        | fr5              |
|                          | 89     | 0.00                    | 4.8                            | 1.89  | 6.2    | 146.4           | 16.0      | 1.3          | 0              | 0.50                   | DH                       | DH                         | 16                             | IM                              | No               | Yes                   | No                | Yes              | No               | Yes             | No                | Yes                    | PV        | fr5              |
| Santa Fé da Laguna (M22) | 90     | 218.70                  | 3.6                            | 0.75  | 6.4    | 2419.0          | 8.0       | 1.8          | 0.30           | 0.60                   | 48                       | 5                          | 15                             | IM                              | No               | Yes                   | No                | Yes              | Yes              | Yes             | Yes               | Yes                    | C         | fr5              |
|                          | 91     | 7.50                    | 1.4                            | 0.65  | 5.5    | 167.0           | 14.0      | 1.5          | 0.20           | 0.60                   | 30                       | 6                          | 24                             | Yes                             | 1                | Yes                   | No                | No               | Yes              | Yes             | Yes               | Yes                    | C         | fr5              |
|                          | 92     | 410.60                  | 24.8                           | 9.6   | 6.6    | 2419.0          | 14.0      | 1.5          | 0              | 0.50                   | 41                       | DH                         | 23                             | Yes                             | No               | Yes                   | No                | Yes              | Yes              | Yes             | No                | Yes                    | C         | fr5              |
|                          | 93     | 1046.20                 | 4.4                            | 0.68  | 6.1    | 2419.0          | 13.0      | 1.5          | 0              | 0.40                   | 12                       | DH                         | 14                             | Yes                             | No               | Yes                   | No                | No               | Yes              | Yes             | No                | Yes                    | C         | fr5              |
|                          | 94     | 2419                    | 7.4                            | 3.3   | 6.6    | 2419.0          | 5.2       | 1.5          | 0              | 0.50                   | 22                       | DH                         | 23                             | Yes                             | No               | Yes                   | No                | Yes              | Yes              | No              | DH                | Yes                    | C         | fr5              |
|                          | 95     | 0.00                    | 1.3                            | 1.28  | 6.4    | 2382.0          | 10.0      | 1.1          | 1.00           | 0.55                   | 43                       | 11                         | 15                             | Yes                             | No               | Yes                   | No                | No               | Yes              | Yes             | Yes               | Yes                    | C         | fr5              |
|                          | 96     | 53.70                   | 2.3                            | 0.57  | 6.0    | 2419.0          | 9.0       | 1.5          | 0              | 0.50                   | 21                       | DH                         | 18                             | Yes                             | No               | Yes                   | No                | Yes              | Yes              | No              | DH                | Yes                    | C         | fr5              |
|                          | 97     | 52.00                   | 7                              | 1.28  | 7.2    | 24196.0         | 7.0       | 1.5          | 0              | 0.35                   | 18.5                     | 19.5                       | 17                             | Yes                             | 1                | Yes                   | No                | Yes              | Yes              | Yes             | Yes               | Yes                    | C         | fr5              |
|                          | 98     | 22.60                   | 8.6                            | 4.13  | 6.3    | 2419.0          | 14.0      | 1.8          | 0              | 0.35                   | 61                       | 16                         | 17                             | IM                              | No               | Yes                   | No                | Yes              | Yes              | Yes             | Yes               | Yes                    | C         | fr5              |
|                          | 99     | 0.00                    | 1.1                            | 0.6   | 6.6    | 2419.0          | 5.0       | 1.0          | 0              | 0.50                   | DH                       | DH                         | DH                             | IM                              | 1                | No                    | No                | Yes              | No               | Yes             | No                | Yes                    | C         | fr5              |
|                          | 100    | 238.20                  | 7.2                            | 2.54  | 5.8    | 2419.0          | 12.0      | 1.5          | 0              | 0.50                   | 24                       | 10                         | 14                             | Yes                             | No               | Yes                   | No                | Yes              | Yes              | Yes             | Yes               | Yes                    | C         | fr5              |
|                          | 101    | 0.00                    | 7.1                            | 4.29  | 6.0    | 1732.9          | 15.0      | 1.5          | 0              | 0.60                   | 106                      | 26                         | 16                             | IM                              | No               | Yes                   | No                | Yes              | Yes              | Yes             | Yes               | Yes                    | C         | fr5              |
|                          | 102    | 1986.30                 | 4                              | 1.26  | 7.0    | 2419.0          | 13.0      | 1.9          | 0              | 0.50                   | 39                       | 20                         | 19                             | Yes                             | 1                | Yes                   | No                | Yes              | Yes              | Yes             | Yes               | Yes                    | C         | fr5              |
| 103                      | 172.60 | 4.5                     | 1.25                           | 6.5   | 1553.1 | 12.0            | 1.5       | 0            | 0.45           | 24                     | DH                       | 23                         | Yes                            | No                              | Yes              | No                    | Yes               | Yes              | Yes              | No              | Yes               | L                      | fr5       |                  |



Supplementary material Table S1 (Cont.)- Response and predictor variables values, continuous and qualitative categorical.

| Community                       |     | Response variable       | Continuous predictor variables |       |     |                 |           |              |                |                        |                          |                           |                                | Categorical predictor variables |                  |                       |                   |                  |                  |                 |                   |                        |           |                  |
|---------------------------------|-----|-------------------------|--------------------------------|-------|-----|-----------------|-----------|--------------|----------------|------------------------|--------------------------|---------------------------|--------------------------------|---------------------------------|------------------|-----------------------|-------------------|------------------|------------------|-----------------|-------------------|------------------------|-----------|------------------|
| Name                            | Nº  | <i>Escherichia coli</i> | Ap. color                      | Turb. | pH  | Total coliforms | DSW depth | DSW diameter | Sidewalk width | Protection wall height | Dist. from pigsty to DSW | Dist. from hennery to DSW | Dist. from permeable SS to DSW | DSW coverage                    | Fence around DSW | Use of exclusive pump | Property flooding | Corral existence | Pigsty existence | Poultry farming | Hennery existence | Permeable SS existence | Soil type | Groundwater type |
|                                 |     | (NMP/100mL)             | (uC)                           | (NTU) |     | (NMP/100mL)     | (m)       | (m)          | (m)            | (m)                    | (m)                      | (m)                       | (m)                            |                                 |                  |                       |                   |                  |                  |                 |                   |                        |           |                  |
| São Lourenço (M23)              | 104 | 122.30                  | 21                             | 4.66  | 5.9 | 15531.0         | 4.0       | 1.4          | 0              | 0.30                   | 26                       | 26                        | 21                             | IM                              | No               | Yes                   | Yes               | Yes              | Yes              | Yes             | Yes               | Yes                    | PV        | fr5              |
|                                 | 105 | 1.00                    | 6.5                            | 2.07  | 5.7 | 727.0           | 8.0       | 1.4          | 0              | 0.65                   | 29                       | 34                        | 6                              | IM                              | No               | Yes                   | No                | Yes              | Yes              | Yes             | Yes               | Yes                    | PV        | fr5              |
| São Sebastião da Garganta (M24) | 106 | 14.40                   | 31.3                           | 8.31  | 5.8 | 988.0           | 2.0       | 0.8          | 0              | 0.10                   | 130                      | DH                        | 150                            | IM                              | 1                | Yes                   | No                | Yes              | Yes              | Yes             | No                | Yes                    | C         | fr5              |
|                                 | 107 | 21.80                   | 1.8                            | 0.31  | 5.4 | 1187.0          | 10.0      | 1.5          | 0              | 0.50                   | DH                       | DH                        | 25                             | Yes                             | No               | Yes                   | No                | Yes              | No               | Yes             | No                | Yes                    | C         | fr5              |
| Tarumã (M25)                    | 108 | 0.00                    | 3.4                            | 1.18  | 4.8 | 2987.0          | 8.5       | 1.0          | 0              | 0.30                   | DH                       | DH                        | 46                             | IM                              | No               | Yes                   | No                | No               | No               | No              | DH                | Yes                    | F         | gr5              |
|                                 | 109 | 0.00                    | 0.8                            | 0.22  | 5.7 | 866.4           | 13.0      | 1.5          | 0              | 0.25                   | 59                       | DH                        | DH                             | Yes                             | No               | Yes                   | No                | Yes              | Yes              | No              | DH                | No                     | F         | gr5              |
|                                 | 110 | 0.00                    | 1.4                            | 0.34  | 4.7 | 2481.0          | 9.0       | 1.2          | 0              | 0.25                   | 22                       | DH                        | 14                             | IM                              | 1                | Yes                   | No                | Yes              | Yes              | Yes             | No                | Yes                    | F         | gr5              |
|                                 | 111 | 1.00                    | 1.5                            | 0.42  | 4.4 | 4611.0          | 8.0       | 1.5          | 0              | 0.40                   | 20                       | DH                        | DH                             | IM                              | No               | Yes                   | No                | Yes              | Yes              | Yes             | Yes               | No                     | F         | gr5              |
|                                 | 112 | 0.00                    | 6                              | 2.31  | 5.1 | 206.4           | 2.0       | 1.5          | 0              | 0.00                   | DH                       | DH                        | DH                             | IM                              | No               | Yes                   | Yes               | No               | No               | No              | DH                | Yes                    | F         | gr5              |
|                                 | 113 | 0.00                    | 2.9                            | 1.85  | 5.3 | 108.1           | 10.0      | 1.5          | 0              | 0.40                   | DH                       | DH                        | 18                             | IM                              | 1                | Yes                   | No                | No               | No               | No              | DH                | Yes                    | F         | gr5              |
|                                 | 114 | 1413.60                 | 3.7                            | 0.78  | 4.7 | 2419.0          | 10.0      | 1.7          | 0              | 0.00                   | 90                       | 63                        | 76                             | IM                              | No               | Yes                   | No                | Yes              | Yes              | Yes             | Yes               | Yes                    | F         | gr5              |
|                                 | 115 | 1.00                    | 10.9                           | 3.04  | 5.8 | 12997.0         | 9.0       | 1.5          | 0              | 0.25                   | 62                       | DH                        | 73                             | IM                              | No               | Yes                   | No                | Yes              | Yes              | No              | DH                | Yes                    | F         | gr5              |

Note: Apparent color = Ap. color; Turbidity = Turb.; Distance from pigsty to DSW = Dist. from pigsty to DSW; Improvised material = IM; Distance from hennery to DSW = Dist. from hennery to DSW; Dist. from permeable SS to DSW = Dist. from permeable SS to DSW; Do not have = DH; Cambisol (C); Plinthsol = F; Gleissolo = G; Oxisol = L; Nitossolo = N; Argisol = PV; Class 4 fractured aquifer = fr4; Class 5 fractured aquifer = fr5; Class 4 Granular Aquifer = gr4; Class 5 Granular Aquifer = gr5; Class 4 karst aquifer = K4.
